# Supplementary material for: Effect of intermolecular hydrogen bonding strength on the dynamic fragility of amorphous polyamides
Source: Royal Society of Chemistry journal article supplement (doi:10.1039/d3sm01523h), 2024-01-01
Supplement: d3sm01523h1.pdf [file d3sm01523h1.pdf]

## Supporting Information

### Effect of Intermolecular Hydrogen Bonding Strength on the Dynamic Fragility of Amorphous Polyamides

Gaopeng Shi\*, Jianjun Zhang, Yangyang Xu\*

College of Chemistry and Materials Science, Anhui Normal University, South Jiu Hua Road 189,  
Wuhu 241002, China

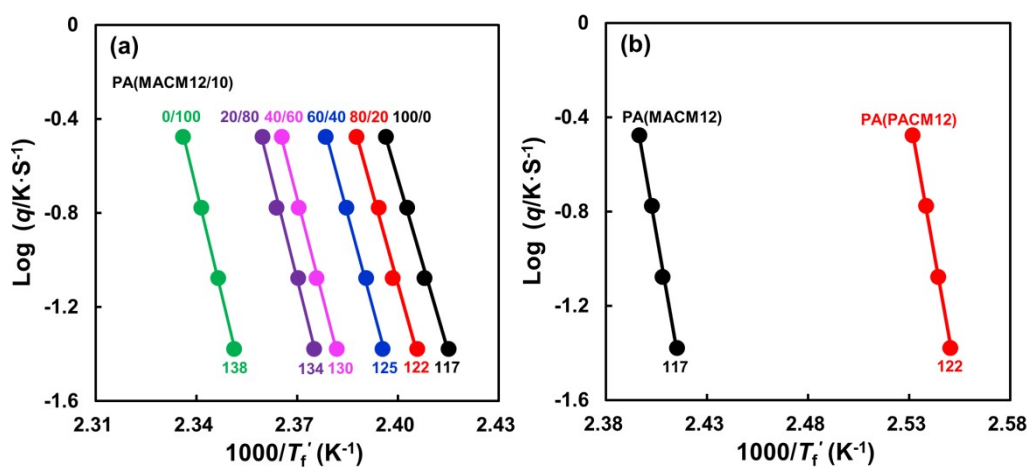

**Figure S1.** Dependence of  $\text{Log } q$  on  $T_f'$  for (a) PA(MACM12/10) with different concentration of DCA and (b) types of diamine. The numbers at the bottom of the lines represent fragilities.

\* Corresponding author: G. Shi, E-mail: gpshi@ahnu.edu.cn; Y. Xu, E-mail: ahnuxyy@ahnu.edu.cn
